# Supplementary material for: A useful valence-alterable optical probe for the prediction of material characteristics based on theoretical calculations
Source: Royal Society of Chemistry journal article supplement (doi:10.1039/d0cp02606a), 2020-01-01
Supplement: d0cp02606a1.pdf [file d0cp02606a1.pdf]

## Supporting Information

### **A Useful Valence-alterable Optical Probe to Serve the Predict of Material Characteristics Based on Theoretical Calculation**

Linghui Zhang<sup>2,3,§</sup>, Guoqiang Peng<sup>2,§</sup>, Yujiang Wang<sup>1</sup>, Tiejun Li<sup>2</sup>, Dan Wang<sup>2</sup>, Lili Han<sup>1\*</sup>, Zhipeng Ci<sup>2,3\*</sup>

*<sup>1</sup>College of Physics and Electronic Engineering, Northwest Normal University, Lanzhou, 730070, China*

*<sup>2</sup>Key Laboratory of Special Function Materials and Structure Design, Ministry of education, Lanzhou University, Lanzhou 730000,*

*<sup>3</sup>China National & Local Joint Engineering Laboratory for Optical Conversion Materials and Technology, School of Physical Science and Technology, Lanzhou University, Lanzhou 730000, China*

\*Corresponding author: [cizhp@lzu.edu.cn](mailto:cizhp@lzu.edu.cn) and [hanlili.06@163.com](mailto:hanlili.06@163.com).

§Both authors contributed equally to this work.

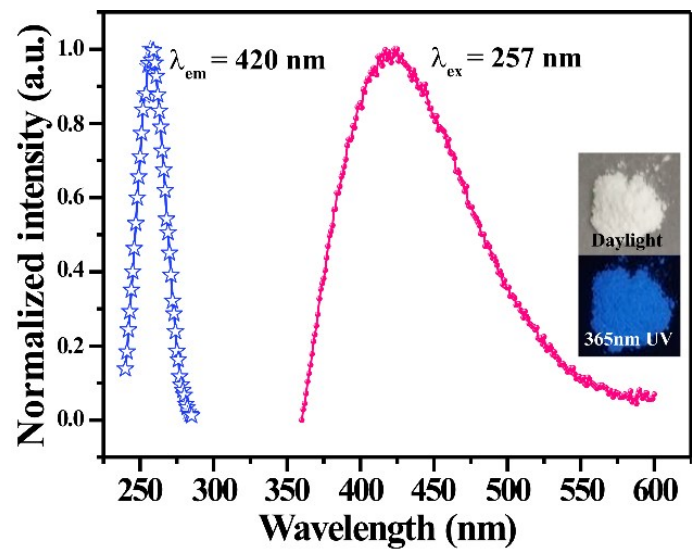

**Figure S1.** The PLE spectrum ( $\lambda_{em}=422 \text{ nm}$ ) and PL spectrum ( $\lambda_{ex}=257 \text{ nm}$ ) of BSSO host.

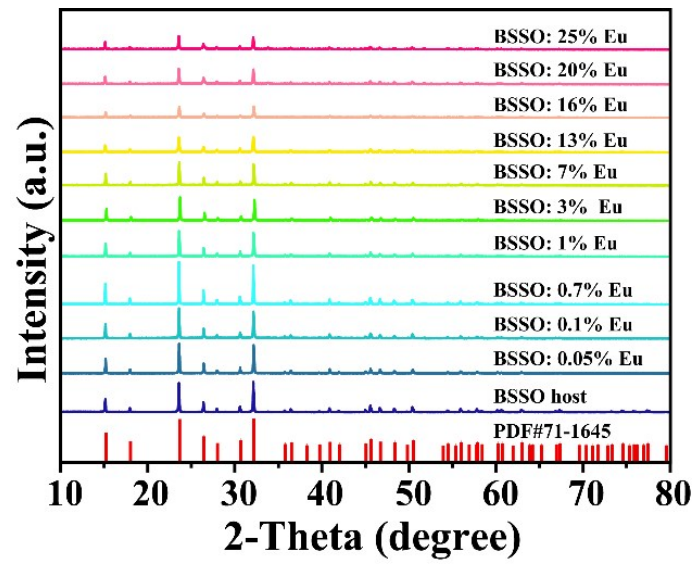

Figure S2. The XRD patterns of the samples BSSO:X % Eu (X=0-25).

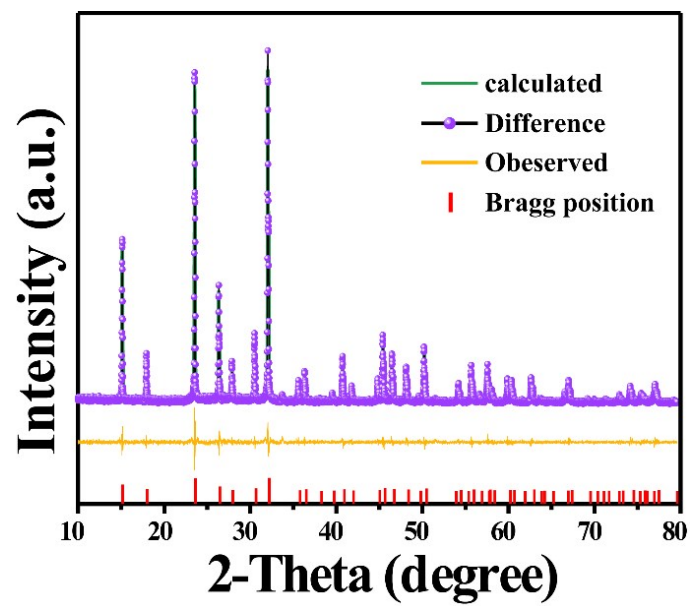

**Figure S3.** The Rietveld refinement XRD pattern of the typical sample BaSnSi<sub>3</sub>O<sub>9</sub>:13% Eu.

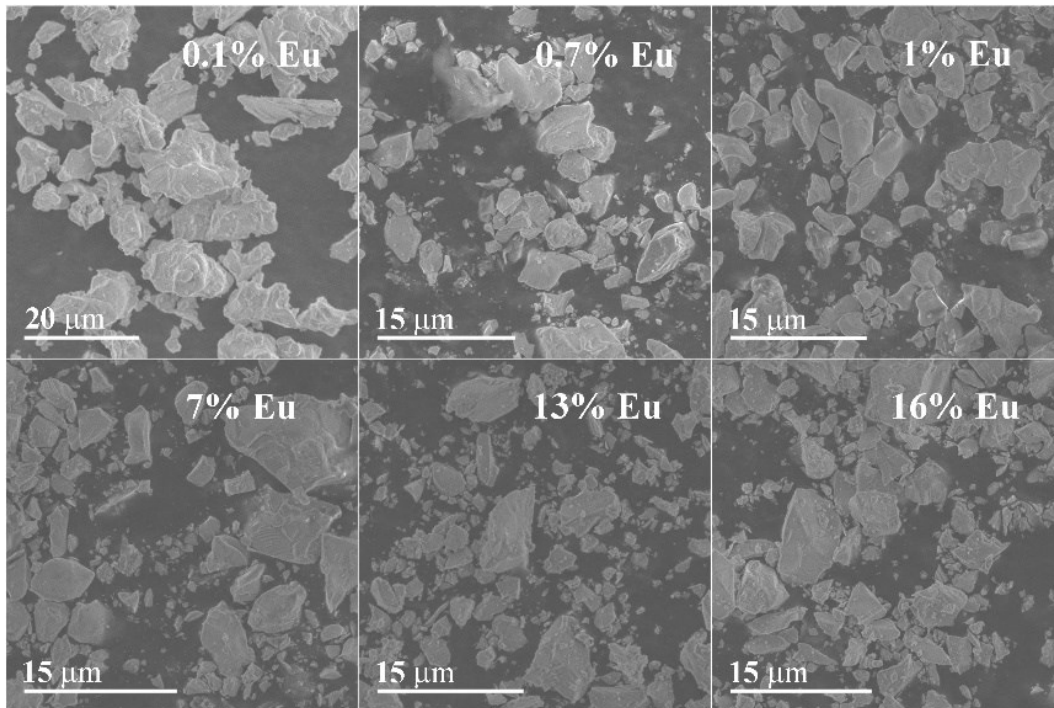

**Figure S4.** The SEM images of BSSO:X% Eu (X= 0.1, 0.7, 1, 7, 13, 16).

The mic-morphologies of the typical samples BaSnSi<sub>3</sub>O<sub>9</sub>:X% Eu mainly present the uneven and micro-scale blocks in **Figure S4**.

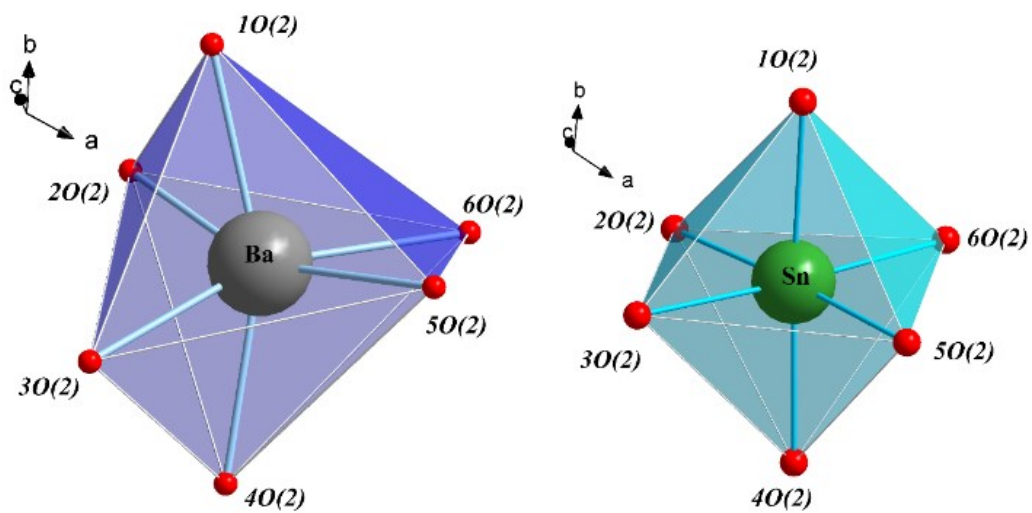

**Figure S5.** The spatial three-dimensional BaO<sub>6</sub> and SnO<sub>6</sub> octahedral structure of matrix BSSO.

**Table S1.** The  $a$ ,  $b$  and  $c$  values of crystal structure BSSO after the CASTEP *GeomOpt* .

| <b>Unit Cell</b>                                      |            |            |                                 |           |           |
|-------------------------------------------------------|------------|------------|---------------------------------|-----------|-----------|
| <b>Real Lattice (Å)</b>                               |            |            | <b>Reciprocal Lattice (1/Å)</b> |           |           |
| 5.9367671                                             | -3.4275941 | 0.0000000  | 1.0583513                       | 0.0000000 | 0.0000000 |
| 0.0000000                                             | 6.8551882  | 0.0000000  | 0.5291757                       | 0.9165591 | 0.0000000 |
| 0.0000000                                             | 0.0000000  | 10.0341159 | 0.0000000                       | 0.0000000 | 0.6261823 |
| <b>Lattice parameters (Å)</b>                         |            |            | <b>Cell Angles</b>              |           |           |
| $a=6.855188$                                          |            |            | $Alpha=90.000000$               |           |           |
| $b=6.855188$                                          |            |            | $Beta=90.000000$                |           |           |
| $c=10.034116$                                         |            |            | $Gamma=120.000000$              |           |           |
| <b>Current cell volume=408.364996 (Å<sup>3</sup>)</b> |            |            |                                 |           |           |

**Table S2.** The detailed crystallographic parameters of BSSO obtained by Rietveld refinement of the XRD data.

| <b>Formula</b>                  | <b>BaSnSi<sub>3</sub>O<sub>9</sub></b> |             |                  |             |                  |
|---------------------------------|----------------------------------------|-------------|------------------|-------------|------------------|
| Crystal system                  | Hexagonal                              |             |                  |             |                  |
| Space group lattice constants   | P6-c2 (188)                            |             |                  |             |                  |
| <i>a</i> /Å                     | 6.7165                                 |             |                  |             |                  |
| <i>b</i> /Å                     | 6.7165                                 |             |                  |             |                  |
| <i>c</i> /Å                     | 9.8194                                 |             |                  |             |                  |
| <i>c/a</i>                      | 1.46198                                |             |                  |             |                  |
| <i>α</i> /°                     | 90                                     |             |                  |             |                  |
| <i>β</i> /°                     | 90                                     |             |                  |             |                  |
| <i>γ</i> /°                     | 120                                    |             |                  |             |                  |
| Cell volume (V/Å <sup>3</sup> ) | 383.625                                |             |                  |             |                  |
| <i>R</i> values                 | R <sub>wp</sub> =14.08 %               |             |                  |             |                  |
|                                 | R <sub>p</sub> =10.29 %                |             |                  |             |                  |
| $\chi^2$                        | 1.937                                  |             |                  |             |                  |
| <b>Atom</b>                     | <b>Wyck</b>                            | <b>x/a</b>  | <b>y/b</b>       | <b>z/c</b>  |                  |
| Ba                              | 2e                                     | 0.6667      | 0.3333           | 0           |                  |
| Sn                              | 2c                                     | 0.3333      | 0.6667           | 0           |                  |
| Si                              | 6k                                     | 0.0645      | 0.2854           | 0.2500      |                  |
| O1                              | 6k                                     | 0.2398      | 0.1835           | 0.2500      |                  |
| O2                              | 12l                                    | 0.0805      | 0.4227           | 0.1167      |                  |
| <b>Bond</b>                     | <b>Length(Å)</b>                       | <b>Bond</b> | <b>Length(Å)</b> | <b>Bond</b> | <b>Length(Å)</b> |
| Ba-2O2                          | 2.78027                                | Sn-2O2      | 2.02451          | Si -O1      | 1.60613          |
| Ba-2O2                          | 2.78047                                | Sn-2O2      | 2.02477          | Si -O1      | 1.63113          |
| Ba-2O2                          | 2.78087                                | Sn-2O2      | 2.02506          | Si -2O2     | 1.57327          |



The relative deviations of ionic radius ( $Dr$ ) between matrix cations and  $\text{Eu}^{3+}/\text{Eu}^{2+}$  can be calculated by following equation:<sup>[1]</sup>

$$Dr(\%) = 100 \times [R_m(CN) - R_d(CN)]/R_m(CN) \quad (1)$$

Where  $Dr$  presents the ionic radius percentage difference;  $R_m(CN)$  and  $R_d(CN)$  are the radius of the host cation and the doped ion, respectively; and  $CN$  is the coordination number. The detailed radii values and the calculated  $Dr$  results of between  $\text{Eu}^{2+}/\text{Eu}^{3+}$  and  $\text{Ba}^{2+}$ ,  $\text{Sn}^{4+}$ ,  $\text{Si}^{4+}$  ions are shown in **Table S3**.

**Table S3.** The relative deviations of ionic radius between matrix cations and doping ions.<sup>[2]</sup>

| Ions             | Radius/Å | CN | Dr (%)  |
|------------------|----------|----|---------|
| $\text{Eu}^{3+}$ | 1.087    | 6  | 0       |
| $\text{Ba}^{2+}$ | 1.49     | 6  | 27.05   |
| $\text{Sn}^{4+}$ | 0.830    | 6  | -30.96  |
| $\text{Si}^{4+}$ | 0.40     | 4  | -171.75 |
| $\text{Eu}^{2+}$ | 1.31     | 6  | 0       |
| $\text{Ba}^{2+}$ | 1.49     | 6  | 12.08   |
| $\text{Sn}^{4+}$ | 0.830    | 6  | -57.83  |
| $\text{Si}^{4+}$ | 0.40     | 4  | -227.5  |

**Table S4.** The detailed crystallographic parameters of BSSO:13% Eu obtained by Rietveld refinement of the XRD data.

| <b>Formula</b>                 |                  | <b>BaSnSi<sub>3</sub>O<sub>9</sub>:13% Eu</b> |                  |             |                  |
|--------------------------------|------------------|-----------------------------------------------|------------------|-------------|------------------|
| Crystal system                 |                  | Hexagonal                                     |                  |             |                  |
| Space group lattice constants  |                  | P6-c2 (188)                                   |                  |             |                  |
| $a/\text{Å}$                   |                  | 6.7630                                        |                  |             |                  |
| $b/\text{Å}$                   |                  | 6.7630                                        |                  |             |                  |
| $c/\text{Å}$                   |                  | 9.8895                                        |                  |             |                  |
| $c/a$                          |                  | 1.4623                                        |                  |             |                  |
| $\alpha/^\circ$                |                  | 90                                            |                  |             |                  |
| $\beta/^\circ$                 |                  | 90                                            |                  |             |                  |
| $\gamma/^\circ$                |                  | 120                                           |                  |             |                  |
| Cell volume ( $V/\text{Å}^3$ ) |                  | 391.723                                       |                  |             |                  |
| $R$ values                     |                  | $R_{wp}=14.22\%$                              |                  |             |                  |
|                                |                  | $R_p=10.79\%$                                 |                  |             |                  |
| $\chi^2$                       |                  | 1.286                                         |                  |             |                  |
| <b>Atom</b>                    | <b>Wyck</b>      | <b>x/a</b>                                    | <b>y/b</b>       | <b>z/c</b>  |                  |
| Ba                             | 2e               | 0.6667                                        | 0.3333           | 0           |                  |
| Sn                             | 2c               | 0.3333                                        | 0.6667           | 0           |                  |
| Si                             | 6k               | 0.0627                                        | 0.2851           | 0.2500      |                  |
| O1                             | 6k               | 0.2421                                        | 0.1789           | 0.2500      |                  |
| O2                             | 12l              | 0.0819                                        | 0.4206           | 0.1179      |                  |
| <b>Bond</b>                    | <b>Length(Å)</b> | <b>Bond</b>                                   | <b>Length(Å)</b> | <b>Bond</b> | <b>Length(Å)</b> |
| Ba-2O2                         | 2.81695          | Sn-2O2                                        | 2.04292          | Si-O1       | 1.57192          |
| Ba-2O2                         | 2.81714          | Sn-2O2                                        | 2.04719          | Si-O1       | 1.69064          |
| Ba-2O2                         | 2.81755          | Sn-2O2                                        | 2.04748          | Si-2O2      | 1.56323          |

**Table S5.** The detailed information about *atom 1(O2)-Ba-atom 3(O2)* bond angle, atom 1 and atom 3 represent O2 atoms located in different position around Ba atom.

| Angle                 | Degrees | Angle                 | Degrees |
|-----------------------|---------|-----------------------|---------|
| <i>1O(2)-Ba-2O(2)</i> | 60.063  | <i>1O(2)-Sn-2O(2)</i> | 91.009  |
| <i>1O(2)-Ba-3O(2)</i> | 104.187 | <i>1O(2)-Sn-3O(2)</i> | 91.126  |
| <i>1O(2)-Ba-4O(2)</i> | 158.451 | <i>1O(2)-Sn-4O(2)</i> | 177.082 |
| <i>1O(2)-Ba-5O(2)</i> | 104.192 | <i>1O(2)-Sn-5O(2)</i> | 91.118  |
| <i>1O(2)-Ba-6O(2)</i> | 94.488  | <i>1O(2)-Sn-6O(2)</i> | 86.851  |
| <i>4O(2)-Ba-2O(2)</i> | 104.192 | <i>4O(2)-Sn-2O(2)</i> | 91.118  |
| <i>4O(2)-Ba-3O(2)</i> | 60.075  | <i>4O(2)-Sn-3O(2)</i> | 90.985  |
| <i>4O(2)-Ba-5O(2)</i> | 94.506  | <i>4O(2)-Sn-5O(2)</i> | 86.826  |
| <i>4O(2)-Ba-6O(2)</i> | 104.203 | <i>4O(2)-Sn-6O(2)</i> | 91.110  |
| <i>2O(2)-Ba-3O(2)</i> | 94.488  | <i>2O(2)-Sn-3O(2)</i> | 86.851  |
| <i>2O(2)-Ba-5O(2)</i> | 158.451 | <i>2O(2)-Sn-5O(2)</i> | 177.082 |
| <i>2O(2)-Ba-6O(2)</i> | 104.187 | <i>2O(2)-Sn-6O(2)</i> | 91.126  |
| <i>3O(2)-Ba-5O(2)</i> | 104.203 | <i>3O(2)-Sn-5O(2)</i> | 91.110  |
| <i>3O(2)-Ba-6O(2)</i> | 158.475 | <i>3O(2)-Sn-6O(2)</i> | 177.115 |
| <i>5O(2)-Ba-6O(2)</i> | 60.075  | <i>5O(2)-Sn-6O(2)</i> | 90.985  |

**The detailed  $E_{cr}$  calculations are shown as follows:**

Zhang and Levine<sup>[3, 4]</sup> extended the theory on the basis of the theory developed by Phillips and Van Vechten (PV),<sup>[5, 6]</sup> which is suitable to the compounds with a complex structure. In this theory, the complicated crystals with molecular formula:  $A_{a1}^1 A_{a2}^2 \dots A_{ai}^i B_{b1}^1 B_{b2}^2 \dots B_{bj}^j$  can be expressed by the following sub-formula:

$$\frac{N(B^j - A^i) \times a^i}{N_{CA^i}} A^i \frac{N(A^i - B^j) \times b^j}{N_{CB^j}} B^j = A_{m_i}^i B_{n_j}^j \quad (2)$$

$$m_i = \frac{N(B^j - A^i) \times a^i}{N_{CA^i}}, \quad n_j = \frac{N(A^i - B^j) \times b^j}{N_{CB^j}} \quad (3)$$

Where

The bond sub formula equation is given by

$$A_{a1}^1 A_{a2}^2 \dots A_{ai}^i B_{b1}^1 B_{b2}^2 \dots B_{bj}^j = \sum_{i,j} A_{m_i}^i B_{n_j}^j \quad (4)$$

where  $A_{a_i}^i$ ,  $B_{b_j}^j$  show the different constituent elements or different sites of the same element in the crystal formula, and  $a_i$ ,  $b_j$  are the number of the corresponding elements.  $N(B^j - A^i)$  is the number of  $B^j$  ions in the coordination group of a  $A^i$  ion, and

$N_{CA^i}$  represents the nearest coordination number of the  $A^i$  ion. Therefore, the complex crystal is decomposed into the sum of diverse binary crystals like  $A_{m_i}^i B_{n_j}^j$ . For any binary  $A_m B_n$ , charge  $Q_A$  is the normal valence of the cation  $A$ , and  $Q_B$  is that obtained

$$\text{from } Q_B = \frac{mQ_A}{n}.$$

According to PV<sup>[5]</sup> and Levine's theory,<sup>[4]</sup> the total macroscopic linear susceptibility  $\chi$  of crystals from the various types of bonds can be represented by the

following equation:

$$\chi = \sum_{\mu} F^{\mu} \chi^{\mu} = \sum_{\mu} N_b^{\mu} \chi_b^{\mu} \quad (5)$$

$$\epsilon^{\mu} = 1 + 4\pi \chi^{\mu} \quad (6)$$

Where  $\epsilon$  is the crystal dielectric constant, obtained from the index of refraction  $n$  ( $\epsilon = n^2$ ).  $\epsilon^{\mu}$  is the dielectric constant of a  $\mu$  type chemical bond,  $F^{\mu}$  is the fraction of bonds of type  $\mu$  composing the actual crystal,  $\chi_b^{\mu}$  is the susceptibility of a single bond of type  $\mu$ , and  $N_b^{\mu}$  is the number of bonds per cubic centimeter.  $\chi^{\mu}$  is the total macroscopic susceptibility which a crystal composed entirely of bonds of type  $\mu$  would have, which can be shown as:

$$\chi^{\mu} = (4\pi)^{-1} (\hbar \Omega_p^{\mu})^2 / (E_g^{\mu})^2 \quad (7)$$

Where  $E_g^{\mu}$  is the average energy gap for  $\mu$  type bonds (in eV),  $\Omega_p^{\mu}$  is the plasma frequency obtained from the number of valence electrons of type  $\mu$  per cubic centimeter  $N_e^{\mu}$ , using the following equation:

$$(\Omega_p^{\mu})^2 = (4\pi(N_e^{\mu})^* e^2/m) D^{\mu} A^{\mu} \quad (8)$$

Where  $D^{\mu}$  and  $A^{\mu}$  are correction factors, their expressions are:

$$D^{\mu}(A,B) = \Delta_A^{\mu} \Delta_B^{\mu} - (\delta_A^{\mu} \delta_B^{\mu} - 1) [(Z_A^{\mu})^* - (Z_B^{\mu})^*]^2 \quad (9)$$

$$A^{\mu} = 1 - \left( \frac{E_g^{\mu}}{4E_F^{\mu}} \right) + \left( \frac{E_g^{\mu}}{4E_F^{\mu}} \right)^2 / 3 \quad (10)$$

Where  $(Z_A^{\mu})^*$  and  $(Z_B^{\mu})^*$  are the numbers of effective valence electrons on the A and B atoms of the  $\mu$  bond,  $\Delta$  and  $\delta$  are the periodic dependent constants<sup>[4]</sup>. The Fermi

energy  $E_F^\mu$  (in eV) is given in terms of the Fermi wave vector  $K_F^\mu$  by

$$E_F^\mu = (\hbar K_F^\mu)^2 / 2m \quad (11)$$

$$(K_F^\mu)^3 = 3\pi^2 (N_e^\mu)^* \quad (12)$$

Here,  $(N_e^\mu)^*$  is the effective valence electron density for the  $\mu$  bond per cubic centimeter and it is given by:

$$(N_e^\mu)^* = (n_e^\mu)^* / v_b^\mu \quad (13)$$

$$(n_e^\mu)^* = \frac{(Z_A^\mu)^*}{N_{CA}^\mu} + \frac{(Z_B^\mu)^*}{N_{CB}^\mu} \quad (14)$$

$$v_b^\mu = (d_\mu)^3 / \sum_\nu (d_\nu)^3 N_b^\nu \quad (15)$$

Where,  $(n_e^\mu)^*$  is the number of effective valence electrons per  $\mu$  bond. The bond volume  $v_b^\mu$  ( $\text{\AA}^3$ ) for the bonds of type  $\mu$  is proportional to  $(d_\mu)^3$ , where  $d_\mu$  is the bond distance ( $\text{\AA}$ ).  $N_b^\nu$  is the number of bonds of type  $\nu$  per cubic centimeter. The average energy gap  $E_g^\mu$  (eV) can be separated into homopolar energy  $E_h^\mu$  (eV) and heteropolar energy  $C^\mu$  (eV) as shown in the equation below:

$$(E_g^\mu)^2 = (E_h^\mu)^2 + (C^\mu)^2 \quad (16)$$

The covalency of any  $\mu$  type bonds is defined as:

$$f_c^\mu = (E_h^\mu)^2 / (E_g^\mu)^2 \quad (17)$$

Where

$$E_h^\mu = 39.74 / (d_\mu)^{2.48} \quad (18)$$

$$C^\mu = 14.4b^\mu \exp(-k_s^\mu * r_o^\mu) \left[ (Z_A^\mu)^* - \left(\frac{n}{m}\right) (Z_B^\mu)^* \right] / r_o^\mu \quad (n > m) \text{ (eV)} \quad (19)$$

$$C^\mu = 14.4b^\mu \exp(-k_s^\mu * r_o^\mu) \left[ \left(\frac{m}{n}\right) (Z_A^\mu)^* - (Z_B^\mu)^* \right] / r_o^\mu \quad (n \leq m) \text{ (eV)} \quad (20)$$

With

$$r_o^\mu = d_\mu / 2 \quad (21)$$

$$k_s^\mu = \left( \frac{4k_F^\mu}{\pi\alpha_B} \right)^{1/2} \quad (22)$$

Here,  $k_s^\mu$  is the Thomas-Fermis screening wavenumber of valence electrons and  $\alpha_B$  is the Bohr radius.  $b^\mu$  is shown in the following equation:

$$b^\mu = \beta(N_C^\mu)^2 \quad (23)$$

$$N_C^\mu = mN_{CA}^\mu / (m+n) + nN_{CB}^\mu / (m+n) \quad (24)$$

Where  $b^\mu$  depends on the crystal structure.

Once the dielectric constant of the crystal is known, the value of  $\beta$  can be deduced from the above equations. When the dielectric constant is unknown, it may also be estimated by using the  $\beta$  value of its isostructural crystals. The environmental factor designated by the symbol  $h_e$  can be expressed as:<sup>[6, 7]</sup>

$$h_e = \left( \sum_{\mu} f_c^\mu \alpha_b^\mu Q_B^{\mu 2} \right)^{1/2} \quad (25)$$

Where  $Q_B^\mu$  stands for the presented charge of the nearest anion in the chemical bond, and  $\alpha_b^\mu$  is the polarizability of the chemical bond volume in the  $\mu$  type of chemical

bonds.

For the chemical bond of type  $\mu$ , the polarizable coefficient  $\alpha_o^\mu$  can be obtained from the Lorentz-Lorenz equation:

$$\frac{\epsilon^\mu - 1}{\epsilon^\mu - 2} = (4\pi/3)\alpha_o^\mu \quad (26)$$

Hence, the polarizability of the chemical bond volume ( $\text{\AA}^3$ ) is given by

$$\alpha_b^\mu = \alpha_o^\mu v_b^\mu \quad (27)$$

By zhang's analysis, the charge transition energy ( $E_{ct}$ ) could be obtained by the following empirical formula:

$$E_{ct} = A + Be^{-khe} \quad (28)$$

Where  $A=2.804$ ,  $B=6.924$ , and  $k=1.256$  for the  $\text{Eu}^{3+}$  ion. These constants only relate to the type of rare earth ion.



## Reference

- [1]. Kasturi, S; Sivakumar, V; Varadaraju, U V, Synthesis and photoluminescence of EuII in barium zinc orthosilicate: a novel green color emitting phosphor for white-LEDs. *Luminescence* 2017, *32*, (3), 334-340.
- [2]. Shannon, R, Revised effective ionic radii and systematic studies of interatomic distances in halides and chalcogenides. *Acta Crystallographica Section A* 1976, *32*, (5), 751-767.
- [3]. Wu, Z J; Zhang, S Y, Semiempirical Method for the Evaluation of Bond Covalency in Complex Crystals. *The Journal of Physical Chemistry A* 1999, *103*, (21), 4270-4274.
- [4]. Levine, B F, Bond susceptibilities and ionicities in complex crystal structures. *J. Chem. Phys.* 1973, *59*, (3), 1463-1486.
- [5]. Phillips, J C, Ionicity of the Chemical Bond in Crystals. *Reviews of Modern Physics* 1970, *42*, (3), 317-356.
- [6]. Gao, F; Zhang, S, Investigation of mechanism of nephelauxetic effect. *Journal of Physics and Chemistry of Solids* 1997, *58*, (12), 1991-1994.
- [7]. Shi, J S; Wu, Z J; Zhou, S H, et al., Dependence of crystal field splitting of 5d levels on hosts in the halide crystals. *Chemical Physics Letters* 2003, *380*, (3), 245-250.
